# Supplementary material for: A review of pharmacogenetic studies in the Bangladeshi population
Source: publisher site journal article supplement (doi:10.1515/dmpt-2022-0194), 2023-02-28
Supplement: Supplementary file 1 [file j_dmpt-2022-0194_suppl_001.docx]

**Supplemental Table 1:** Studies with pharmacogene frequencies in random adult Bangladeshi volunteers.

| Author (Year) | Participants (n) | Gene(s) Studied | Genotyping Method | Genotype frequencies (%) | Allelic Frequencies (%) |
| --- | --- | --- | --- | --- | --- |
| Ahsan et al., 2003 [33] | 134 | *MPO*  *CAT* | SNP genotyping with fluorescence polarization  detection | ***MPO* -463G>A**  GG: 71.1  GA: 26.0  AA: 2.9  ***CAT* -262C>T**  CC: 69.2  CT: 27.9  TT: 2.9 | ***MPO* -463G>A**  G: 84.13  A: 15.87  ***CAT* -262C>T**  C: 83.17  T: 16.83 |
| Akther et al., 2016 [34] | 188 | *GSTM1*  *GSTT1* | Allele-specific PCR | *GSTM1/GSTT1* (+/+): 54.1  *GSTM1/GSTT1* (+/-): 9.2  *GSTM1/GSTT1*(-/+): 32.1  *GSTM1/GSTT1*(-/-): 4.6 | ***GSTM1***  Present (+): 63.3  Null (-): 36.7  ***GSTT1***  Present: 86.2  Null: 13.8 |
| Ali et al., 2008 [35] | 141 | *HLA-A*  *HLA-B*  *HLA-DRB1* | Low-resolution single specific primer-polymerase  chain reaction (SSP-PCR) |  | ***HLA-A***  (*01: 9.57, *02: 14.54, *03: 3.55, *11: 1.56, *23: 0.07, *24: 16.31, *25: 3.90,*26: 3.19,*29: 1.42, *30: 0.07, *31: 4.61, *32: 0.07, *33: 17.02,*36: 0.03, *68: 0.07, *74: 0.03)  ***HLA-B***  (*05: 0.03, *07: 0.50, *08: 0.07, *13: 2.48, *15: 19.5, *18: 1.42, *27: 1.77, *35: 17.02, *37: 3.19, *38: 3.19, *39: 1.06, *40: 6.74, *41: 0.03, *44: 9.22, *46: 0.03, *51: 6.02, *52: 8.51, *53: 0.07, *55: 4.25, *57: 3.55, *58: 2.48, *67: 0.03, *73: 0.03, *75: 0.07, *78: 0.03, *81: 0.03)  ***HLA-DRB1***  (*01: 1.77, *03: 4.25, *04: 10.28, *07: 21.28, *08: 0.07, *09: 0.03, *10: 5.67, *11: 2.83, *12: 11.35, *13: 4.23, *14: 6.74, *15: 29.07, *16: 1.06, *17: 0.03) |
| Aziz et al., 2019 [36] | 201 | *CYP2D6*  *CYP3A5* | Allele-specific multiplex PCR | ***CYP2D6* 4180G>C (*6)**  GG: 35  GC: 43  CC: 22  ***CYP3A5* 6986A>G (*3)**  GG: 46  GA: 47  AA: 7 | ***CYP2D6* 4180G>C (*6)**  G: 57  C: 43  ***CYP3A5* 6986A>G (*3)**  G: 64  A: 36 |
| Hasan et al., 2019 [37] | 98 | *ABCA1* | PCR-RFLP | ***ABCA1* 69C>T**  CC: 31.63  CT: 58.16  TT: 10.21 | ***ABCA1* 69C>T**  C: 60.71  T: 39.29 |
| Hosen et al., 2015 [38] | 140 | *NAT2* | PCR-RFLP |  | ***NAT2***  M1: 20.4  M2: 32.0  M3: 18.9 |
| Islam et al., 2013 [39] | 116 | *CYP2A6*  *CYP1A1*  *CHRNA5* | PCR-RFLP | ***CYP1A1* rs4646903**  TT: 59.48  TC: 32.76  CC: 7.76  ***CYP1A1* rs1048943**  AA: 71.55  AG: 25.86  GG: 2.59  ***CYP2A6 (*1B1 and *4)***  1A/1A: 35.34  1A/1B1: 31.03  1B1/1B1: 14.66  1A/4: 6.90  1B1/4: 8.62  4/4: 3.45  ***CHRNA5* rs16969968**  GG: 62.07  AG: 34.48  AA: 3.45 | ***CYP1A1* rs4646903**  T: 75.9  C: 24.1  ***CYP1A1* rs1048943**  A: 84.5  G: 15.5  ***CYP2A6 (*1B1 and *4)***  1/1†: 81.03  1/4‡+4/4: 18.97  ***CHRNA5* rs16969968**  G: 79.3  A: 20.7 |
| Islam et al., 2018 [40] | 125 | *SLC22A2* | Allele-specific PCR | ***SLC22A2* rs316019**  GG: 76  GT: 20.80  TT: 3.20 | ***SLC22A2* rs316019**  G: 86  T: 14 |
| Islam et al., 2021 [32] | 1000 patients with cardiovascular diseases who underwent PCI | *CYP2C19 ITGB3* | Tetra-primer ARMS-PCR and PCR-RFLP | ***CYP2C19**2**  GG: 35.9  GA: 47.2  AA: 16.9  ***CYP2C19**17**  CC: 77.3  CT: 20.4  TT: 2.3  ***ITGB3* rs5918**  PlA1/A1: 84.1  PlA1/A2: 15.6  PlA2/A2: 0.3 | ***CYP2C19**2**  G: 59.5  A: 40.5  ***CYP2C19**17**  C: 87.5  T: 12.5  ***ITGB3* rs5918**  PlA1: 91.9  PlA2: 8.1 |
| Jahan et al., 2019 [41] | 149 | *TLR4* | PCR-RFLP | ***TLR4* Asp299Gly**  Asp299Asp: 83.2  Asp299Gly:16.8  Gly299Gly: 0  ***TLR4* Thr399Ile**  Thr399Thr: 82.6  Thr399Ile: 17.4  Ile399Ile: 0 | ***TLR4*****Asp299Gly**  Asp: 91.6  Gly: 8.4  ***TLR4* Thr399Ile**  Thr: 91.3  Ile: 8.7 |
| Khan et al., 2020 [42] | 181 | *MTHFR* | Allele-specific PCR | ***MTHFR* G677A**  GG: 71.8  GA: 28.2  AA: 0 | ***MTHFR* G677A**  G: 85.6  A: 14.4 |
| McCarty et al., 2007 [43] | 600 | *GSTT1*  *GSTM1*  *GSTP1* | Multiplex PCR | ***GSTP1***  AA: 53.60  AG: 40.30  GG: 6.10 | ***GSTT1***  Null: 18.80  Wildtype: 81.20  ***GSTM1***  Null: 41  Wildtype: 59  ***GSTP1***  A: 72.57  G: 27.43 |
| Montazid et al., 2021 [44] | 673 | *CYP2C19* | Allele-specific PCR and  Targeted DNA sequencing | ***CYP2C19***  *1/*1: 16.20  *1/*2: 52.90  *1/*3: 0.15  *1/*4: 0.45  *1/*17: 13.97  *2/*2: 0.89  *2/*4: 0.15  *2/*4/*17: 0.15  *2/*17: 13.08  *2/*17/*17: 0.45  *2/*2/*17/*17: 0.15  *3/*17: 0.15  *17/*17: 1.34 | ***CYP2C19***  *1: 49.9  *2: 34.4  *3: 0.1  *4: 0.4  *17: 15.6 |
| Ng et al., 2014 [45] | 49 | *NAT2* | PCR-RFLP |  | ***NAT2***  *4: 21.0  *5: 25.0  *6: 41.0  *7: 13.0 |
| Sonia et al., 2021 [46] | 175 | *COMT*  *DRD4* | Allele-specific PCR | ***COMT* Val158Met**  Val/Val: 44.6  Val/Met: 34.3  Met/Met: 21.1  ***DRD4* 120bp VNTR**  120 bp/120 bp: 14.2  120 bp/240 bp: 38.8  240 bp/240 bp: 47.0 | ***COMT* Val158Met**  Val (G): 55.5  Met (A): 44.5  ***DRD4* 120bp VNTR**  120 bp: 33.6  240 bp: 66.4 |
| Tasnim et al., 2017 [47] | 242 | *SULT1A1*  *XRCC1* | PCR-RFLP | ***SULT1A1* rs9282861**  GG: 51.24  GA: 25.62  AA: 23.14  ***XRCC1* rs25487**  GG: 56.61  GA: 28.51  AA: 14.88 | ***SULT1A1* rs9282861**  G: 64.05  A: 35.95  ***XRCC1* rs25487**  G: 70.87  A: 29.13 |

***Abbreviations:*** *ABCA1*, ATP binding cassette subfamily A member 1; *ApoE*, Apolipoprotein E; *CAT*, Catalase; *CHRNA5*, Cholinergic receptor nicotinic alpha 5 subunit; *COMT*, Catechol-O-methyltransferase; *CYP1A1*, Cytochrome P450 1A1; *CYP2A6*, Cytochrome P450 2A6; *DRD4*, Dopamine receptor D4; *GSTM1*, Glutathione S-transferase mu 1; *GSTP1*, Glutathione S-transferase pi 1; *GSTT1*, Glutathione S-transferase theta 1; *HLA-A*, Major histocompatibility complex, class I, A; *HLA-B*, Major histocompatibility complex, class I, B; *HLA-DRB1*, Major histocompatibility complex, class II, DR beta 1; *ITGB3*, Integrin Subunit Beta 3 (platelet glycoprotein IIIa); *MPO*, Myeloperoxidase; *MTHFR*, Methylenetetrahydrofolate reductase; *NAT2*, N-acetyltransferase 2; PCI, Percutaneous coronary intervention; PCR-RFLP, Polymerase chain reaction-restriction fragment length polymorphism; PIA1/A2, Platelet glycoprotein IIIa receptor polymorphism; *SULT1A1*, Sulfotransferase family 1A member 1; *TLR4*, Toll-like receptor 4; *XRCC1*, X-ray repair cross complementing 1.

1/1† consists of *CYP2A6**1A/1A, *CYP2A6**1A/1B1 and *CYP2A6**1B1/1B1. 1/4‡ consists of *CYP2A6**1A/4, *CYP2A6**1B1/4 [44].

+/+ indicates the presence of both *GSTM1* and *GSTT1* alleles; +/− indicates the presence of *GSTM1* and absence of *GSTT1* alleles (*GSTT1* null genotypes); −/+ indicates the absence of *GSTM1* and presence of *GSTT1* alleles (*GSTM1* null genotypes); −/− indicates the absence of both *GSTM1* and *GSTT1* alleles [39].

**Supplemental Table 2:** Quality assessment of included studies following the assessment tool adapted from Jorgensen and Williamson [25].

| Study | 1. Choosing the genes/SNPs to genotype | | | | 2. Sample Size | | | 3. Study Design | 4. Reliability of Genotypes | | | | | 5. Missing Genotype Data | | | | | | 6. Population Stratification | | | 7. Hardy-Weinberg Equilibrium (HWE) | | | | | 8. Choice and Definition of Outcomes | | |
| --- | --- | --- | --- | --- | --- | --- | --- | --- | --- | --- | --- | --- | --- | --- | --- | --- | --- | --- | --- | --- | --- | --- | --- | --- | --- | --- | --- | --- | --- | --- |
|  | *Was a literature review undertaken and were the findings summarized?* | *Are reasons given for choosing the genes and SNPs genotyped?* | *Is the method to adjust for multiple testing described?* | *Are precise p-values provided for all associations?* | *What is the sample size?* | *Are details given of how the sample size was calculated?* | *Are details given of the a priori power to detect effect sizes of varying degrees?* | *What is the study design?* | *Is the genotyping procedure described?* | *Are the primers described?* | *Were quality control methods used and described?* | *Are any genotype frequencies previously reported quoted?* | *Were genotyping personnel blinded to outcome status?* | *Is the extent of missing data summarized?* | *Where extent is summarized are reasons for missing data given?* | *Are checks for missingness at random reported?* | *Is missing genotype data imputed?* | *Does paper quote number of patients contributing to each analysis?* | *If paper does quote number of patients contributing to analyses does this agree to sample size?* | | *Are tests undertaken for cryptic population stratification?* | *Is cryptic population stratification adjusted for in the analyses?* | | *Was HWE tested?* | *Where test undertaken, are SNPs deviating from HWE highlighted?* | *Where test undertaken, and some SNPs found to deviate, are deviating SNPs excluded from further analysis?* | *Does the paper clearly define all outcomes investigated?* | | *Is justification provided for the choice of outcomes?* | *Are results shown for all outcomes mentioned?* |
| Studies included in Table 1 (n=11) | | | | | | | | | | | | | | | | | | | | | | | | | | | | | | |
| Bin Sayeed *et al.* (2015) [26] | 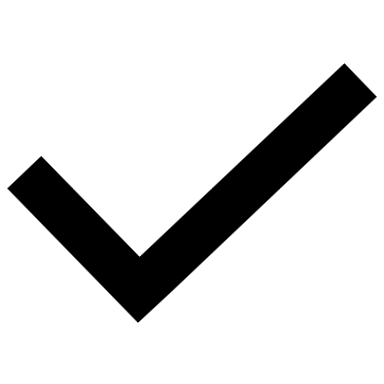 | 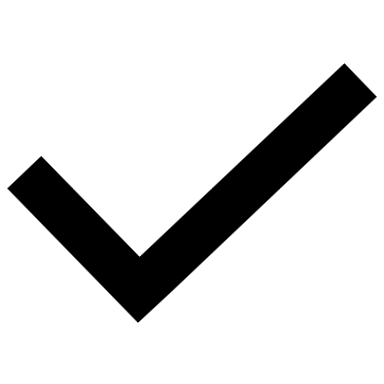 | 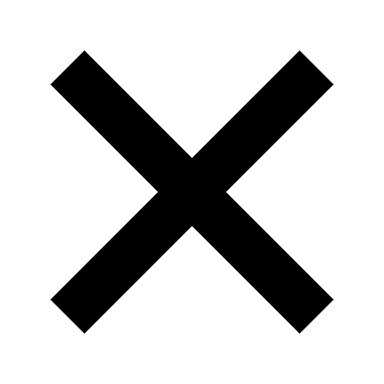 | 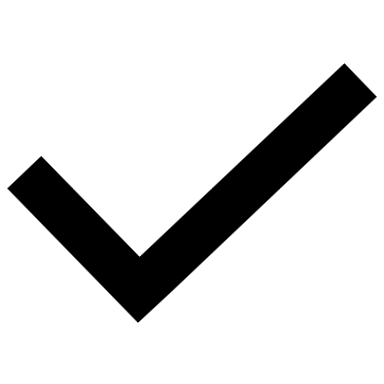 | 328 | NO | NO | Prospective Cohort | 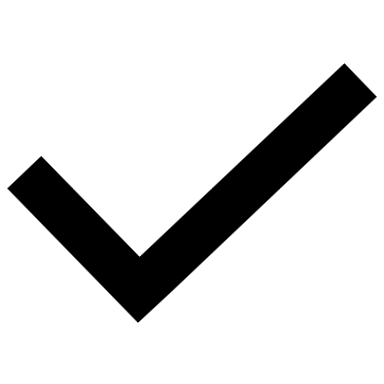 | 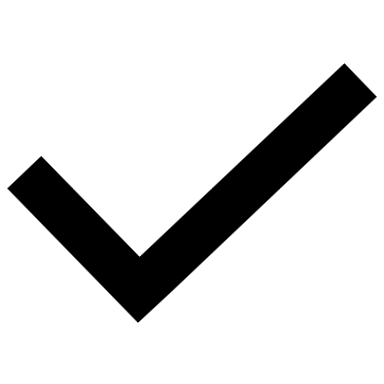 | 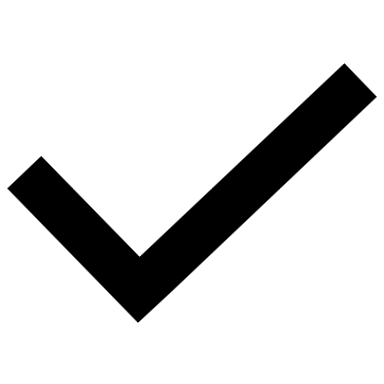 | 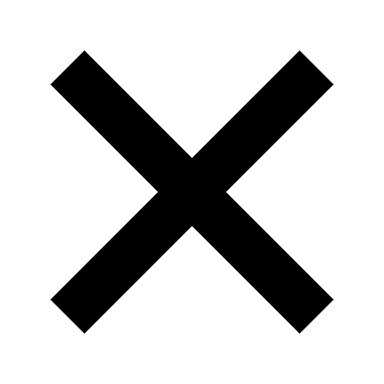 | 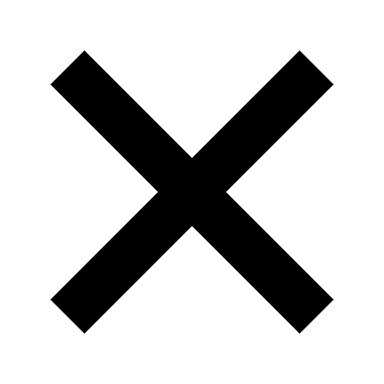 | 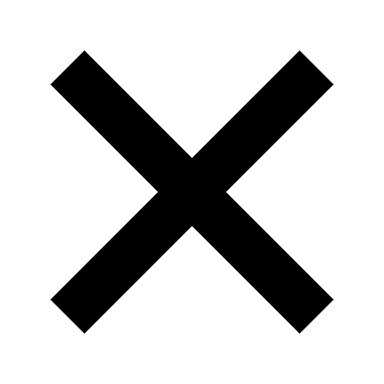 |  |  |  | 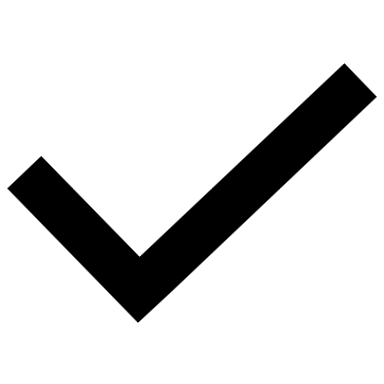 | 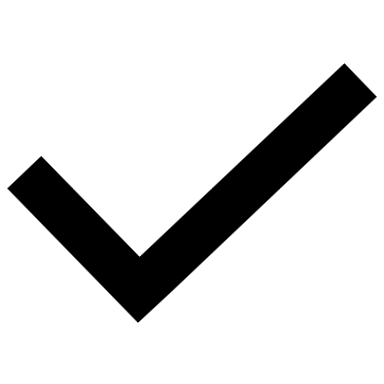 | | 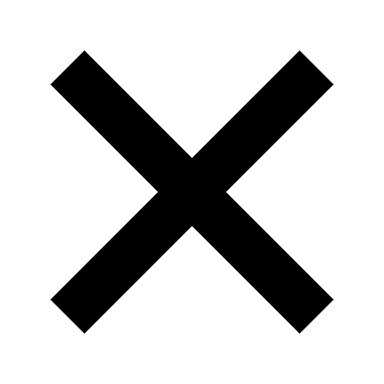 |  | | 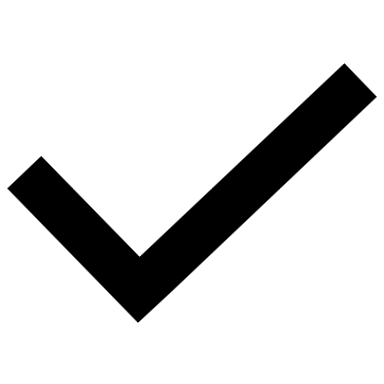 | 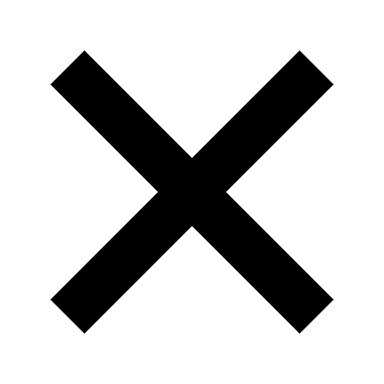 | 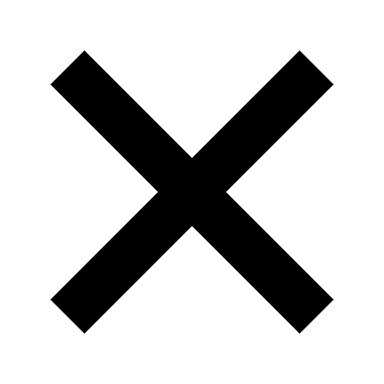 | 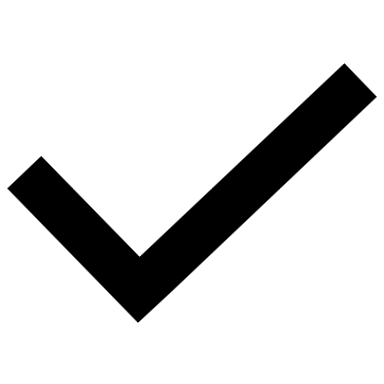 | | 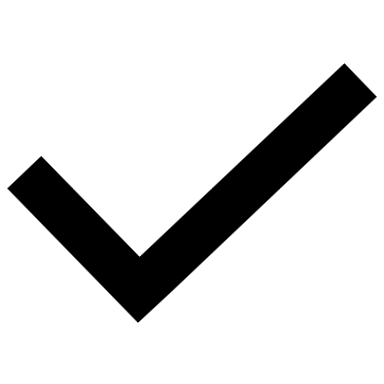 | 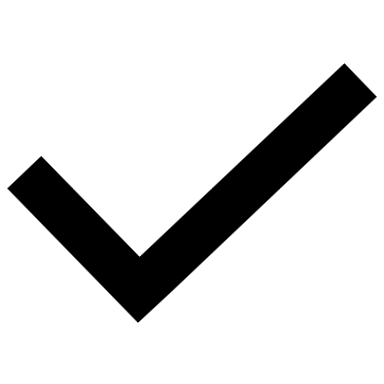 |
| Bushra *et al.* (2020) [27] | 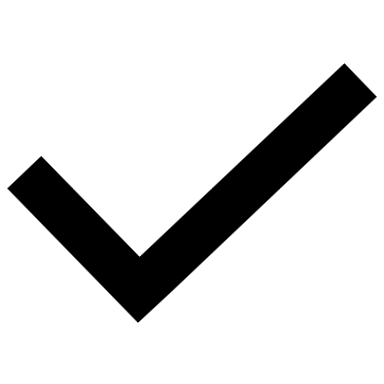 | 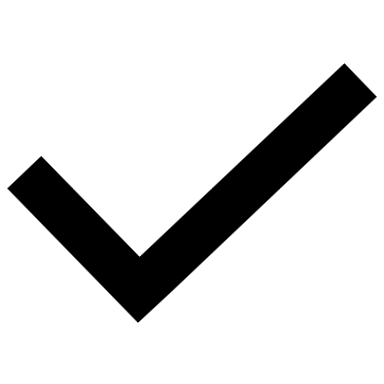 | 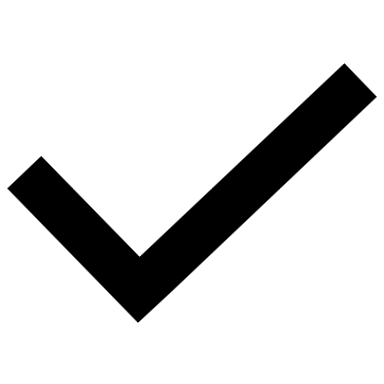 | 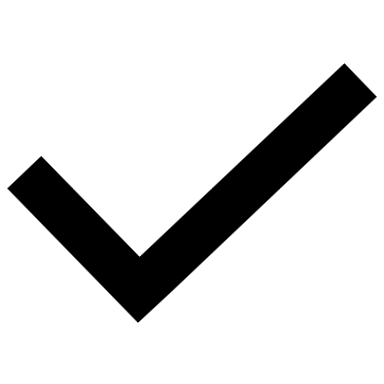 | 285 | NO | NO | Cross-sectional | 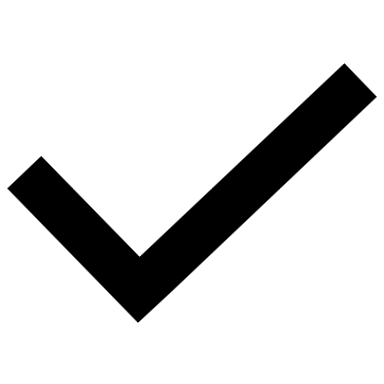 | 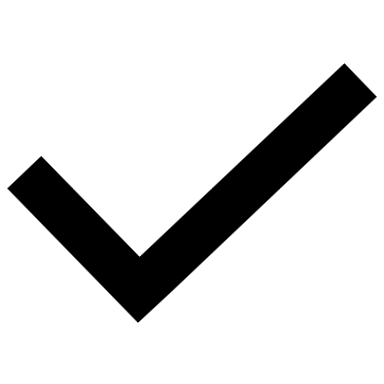 | 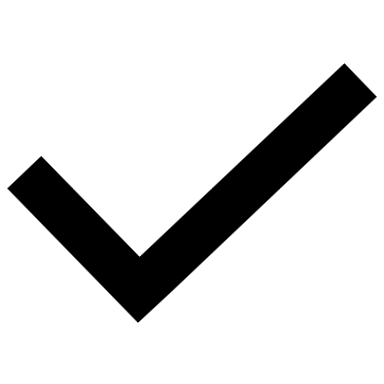 | 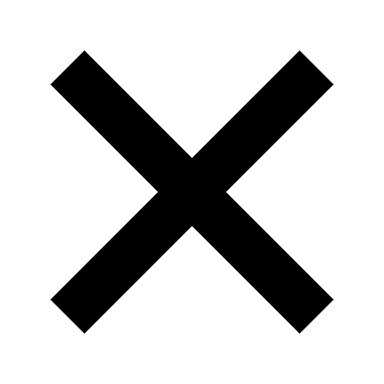 | 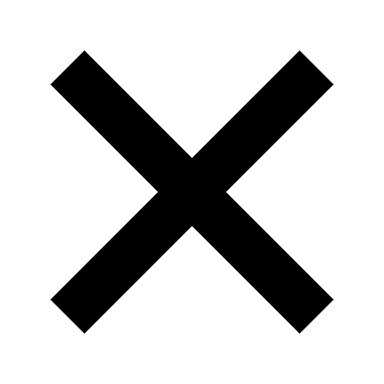 | 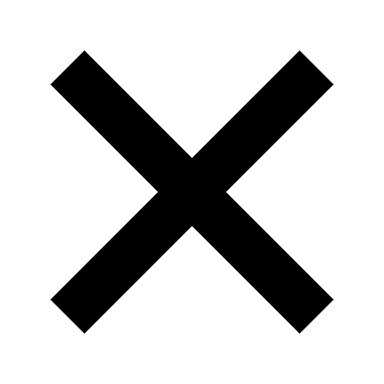 |  |  |  | 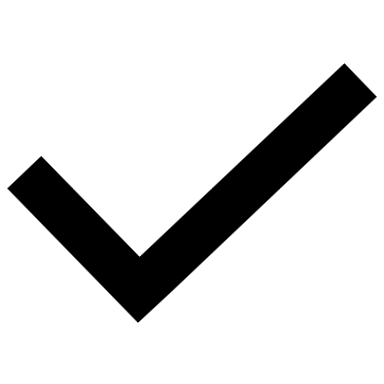 | 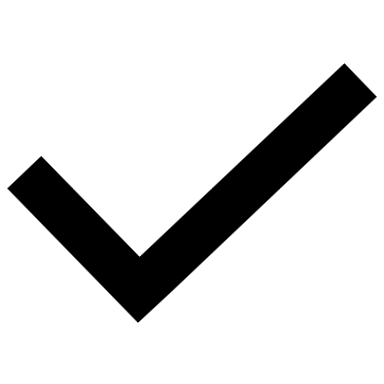 | | 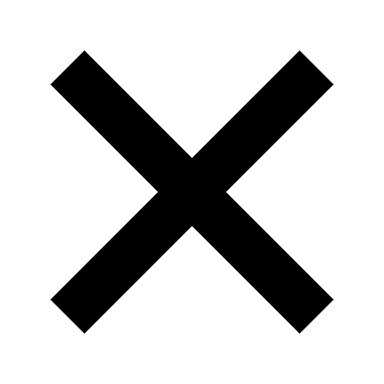 |  | | 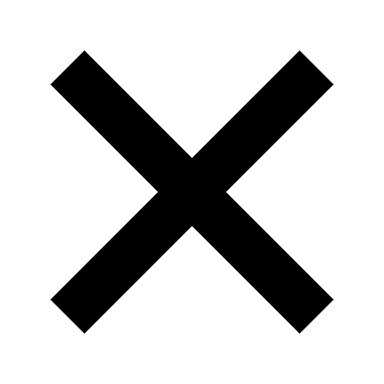 |  |  | 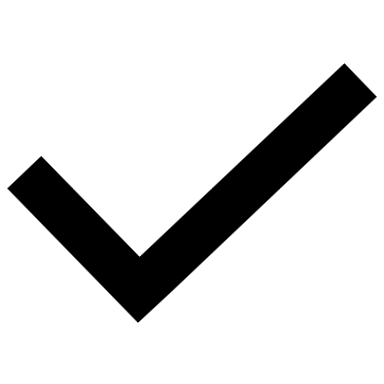 | | 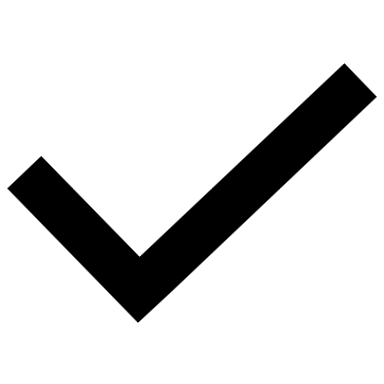 | 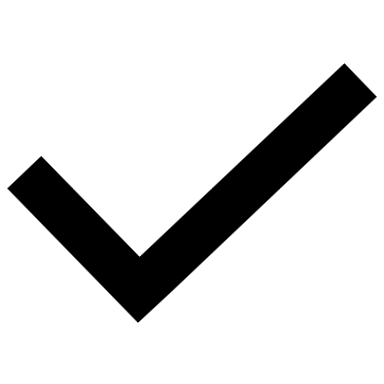 |
| Chowdhury *et al.* (2017) [28] | 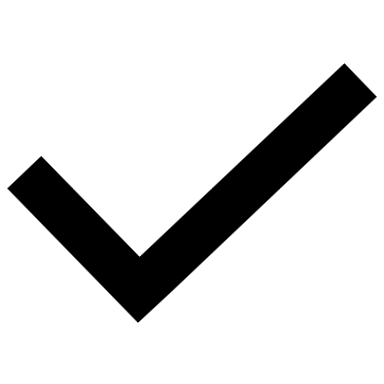 | 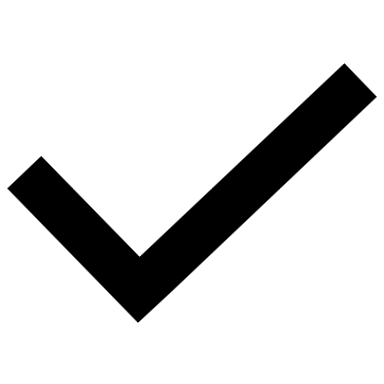 | 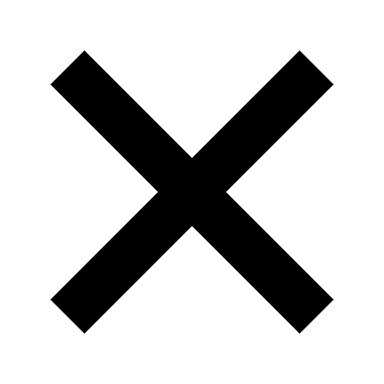 | 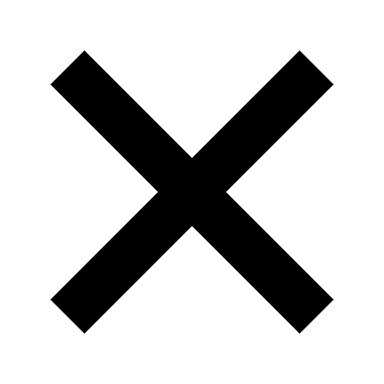 | 87 | NO | NO | Cross-sectional | 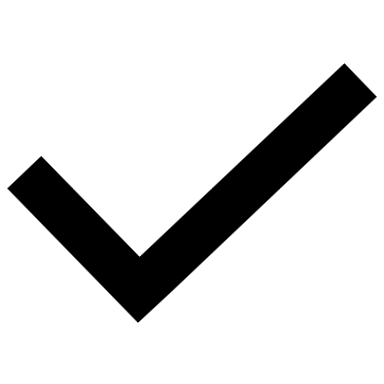 | 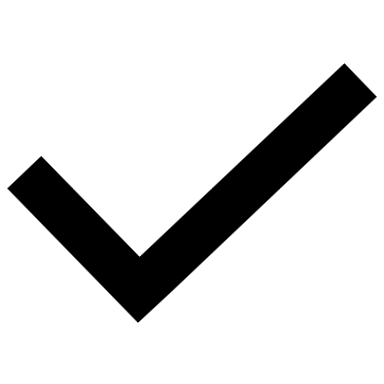 | 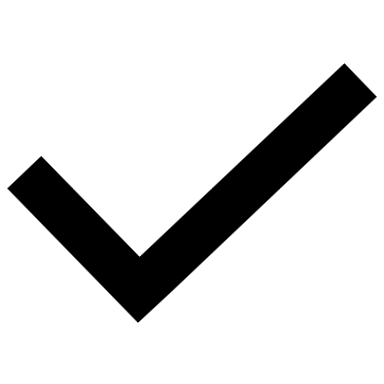 | 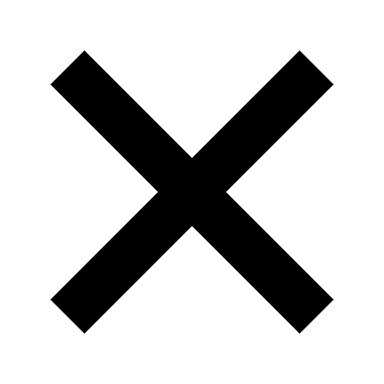 | 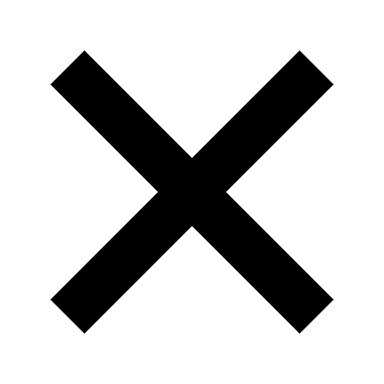 | 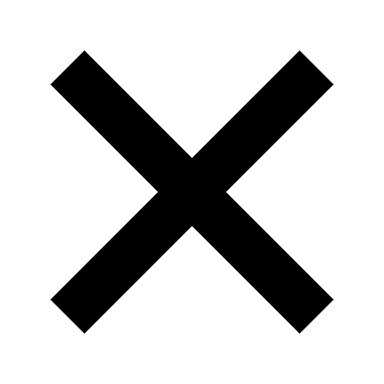 |  |  |  | 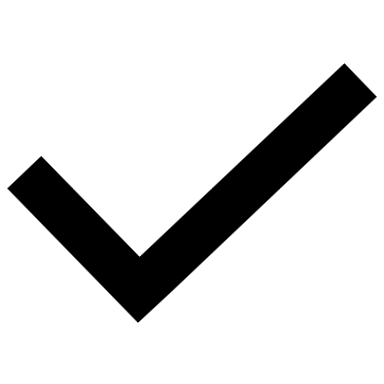 | 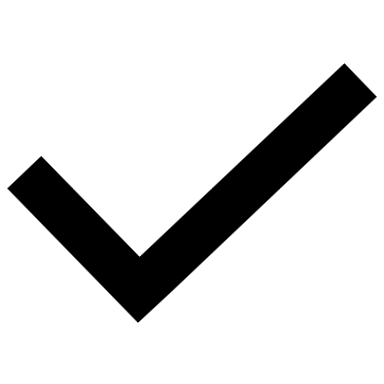 | | 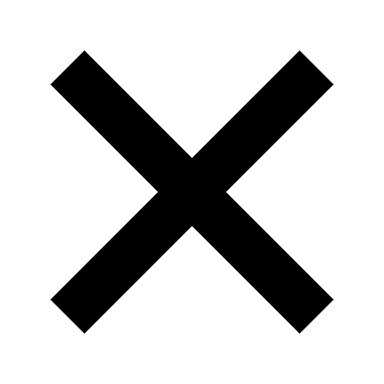 |  | | 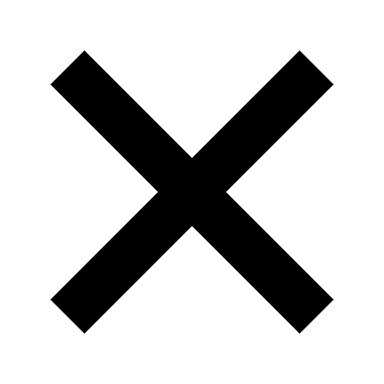 |  |  | 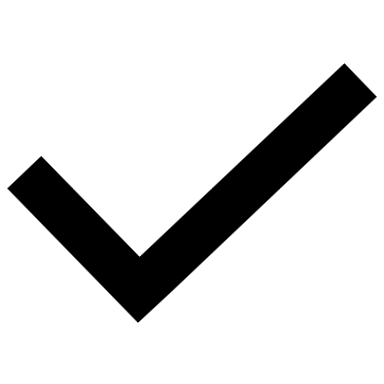 | | 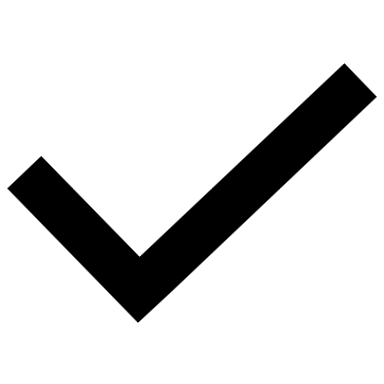 | 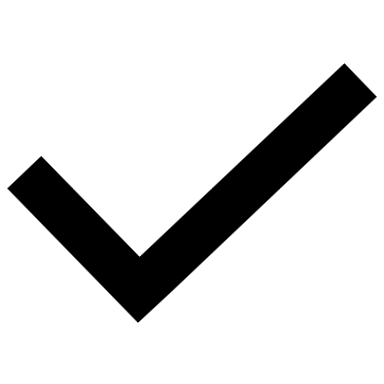 |
| Chowdhury *et al.* (2019) [29] | 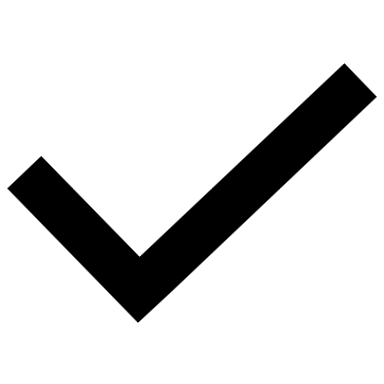 | 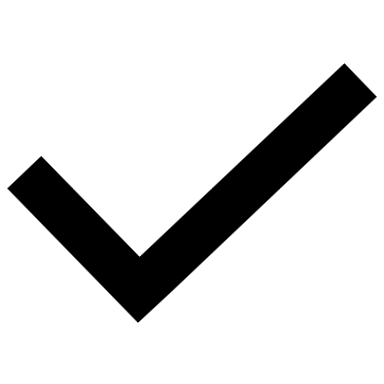 | 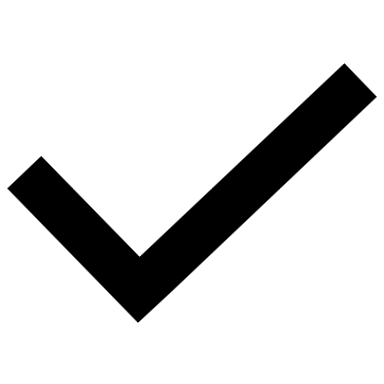 | 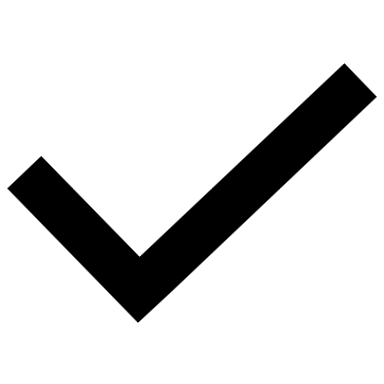 | 151 | NO | NO | Prospective Observational | 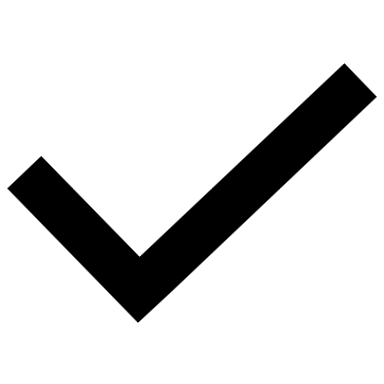 | 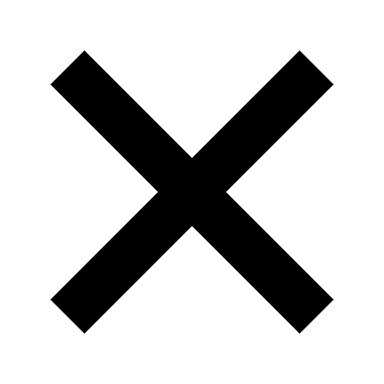 | 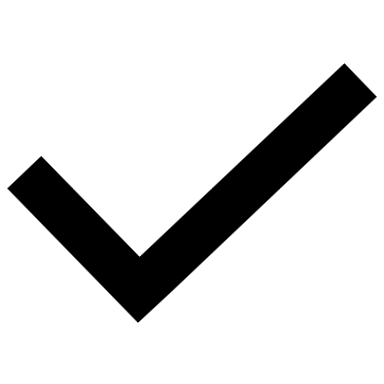 | 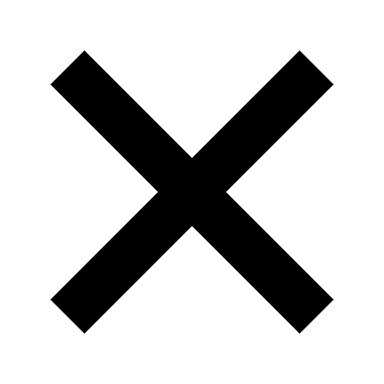 | 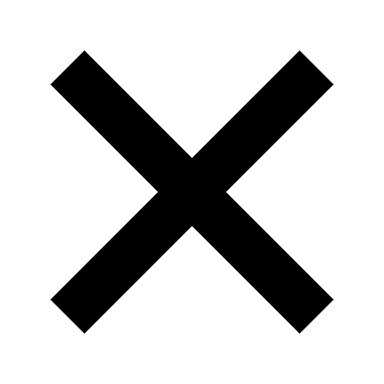 | 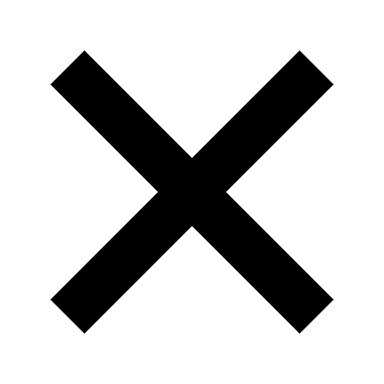 |  |  |  | 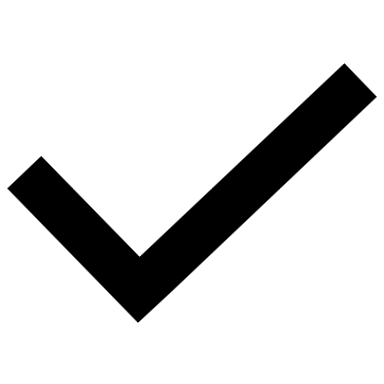 | 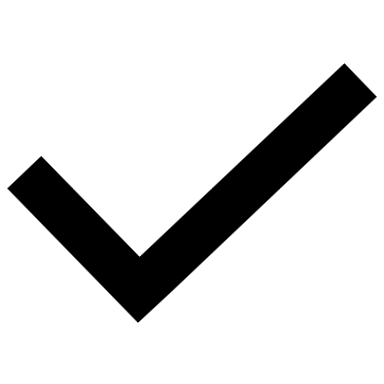 | | 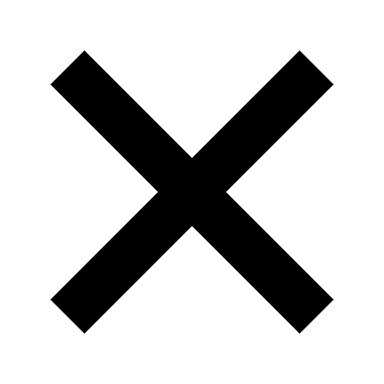 |  | | 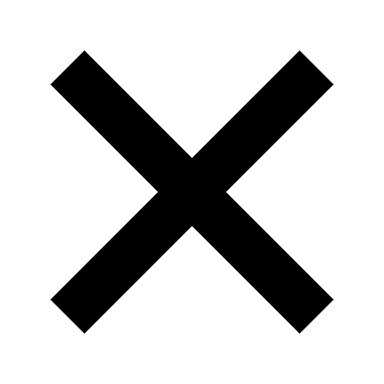 |  |  | 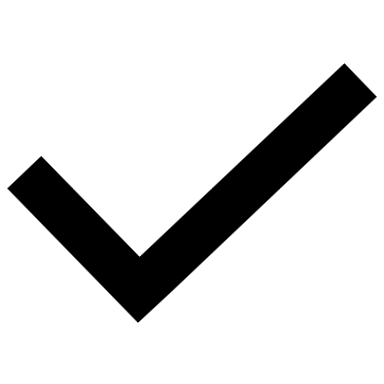 | | 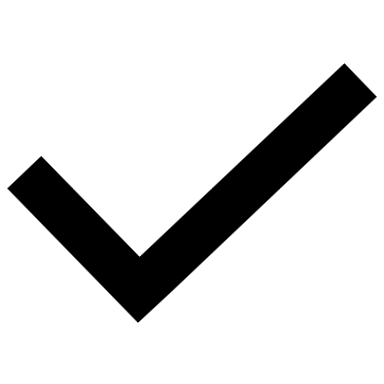 | 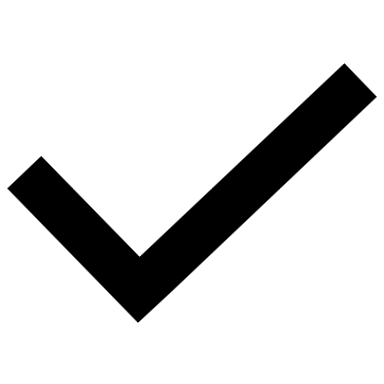 |
| Islam *et al.* (2015) [30] | 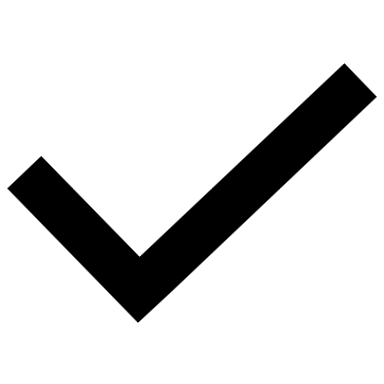 | 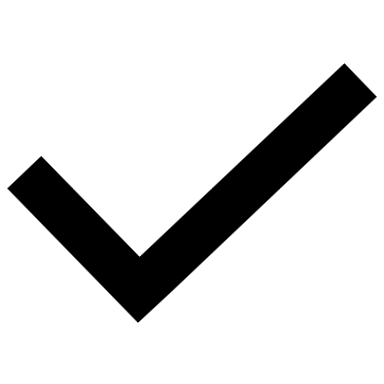 | 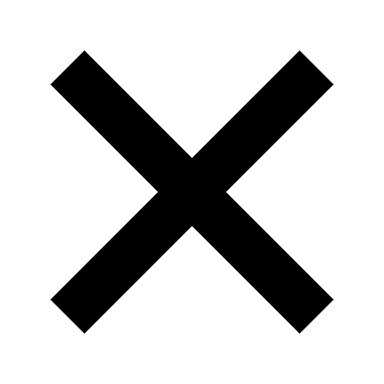 | 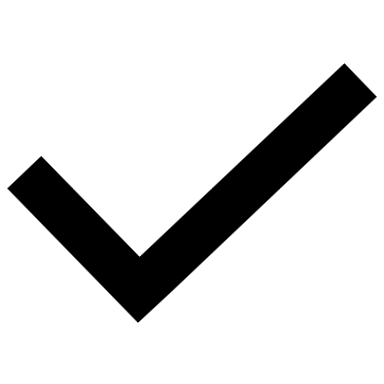 | 256 | NO | NO | Prospective Cohort | 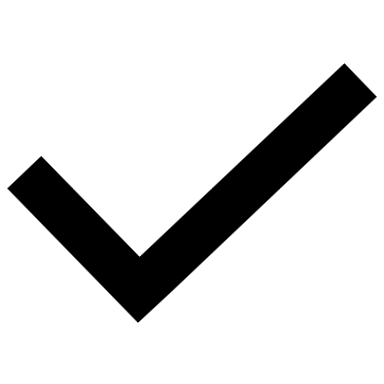 | 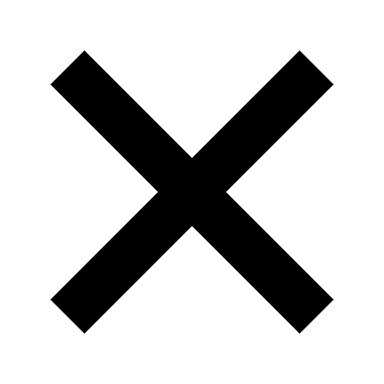 | 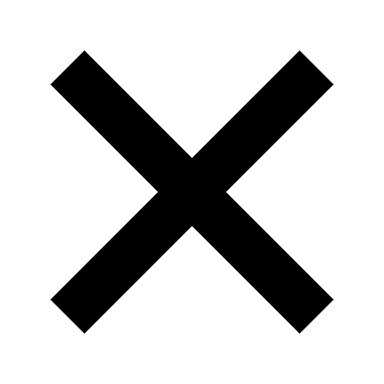 | 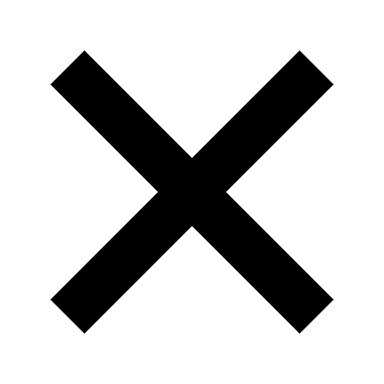 | 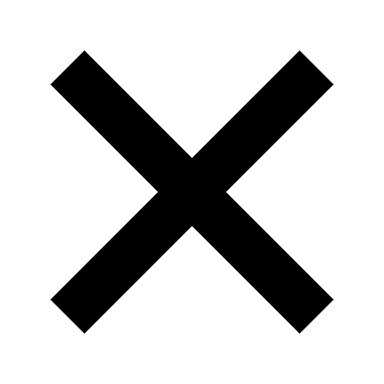 | 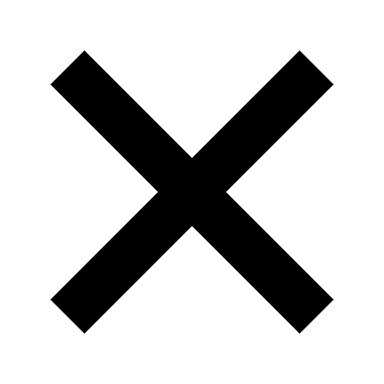 |  |  |  | 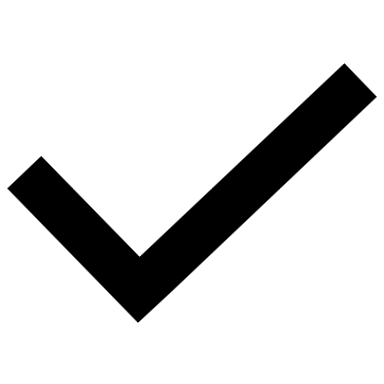 | 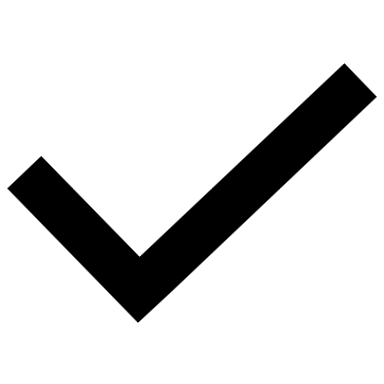 | | 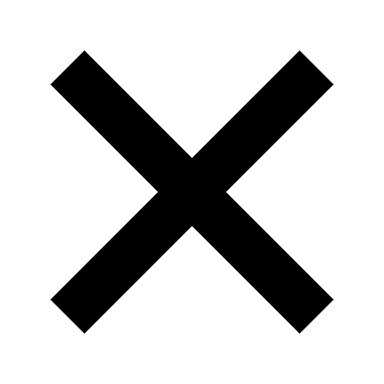 |  | | 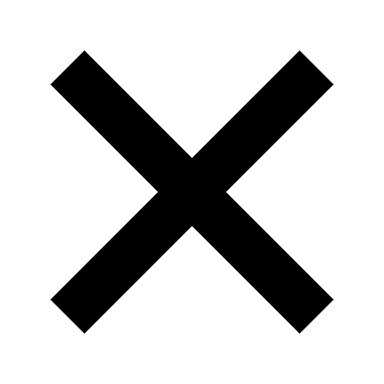 |  |  | 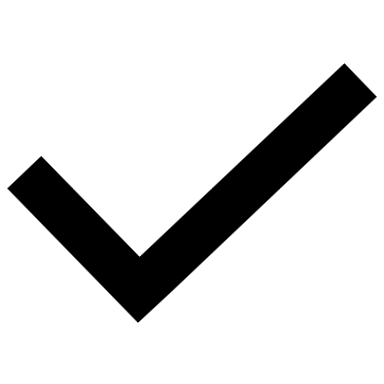 | | 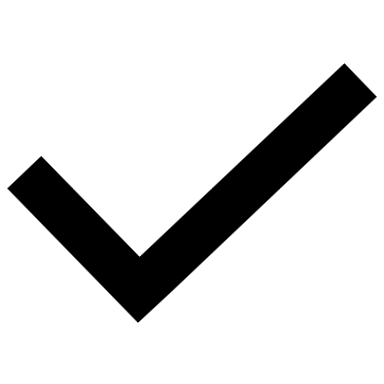 | 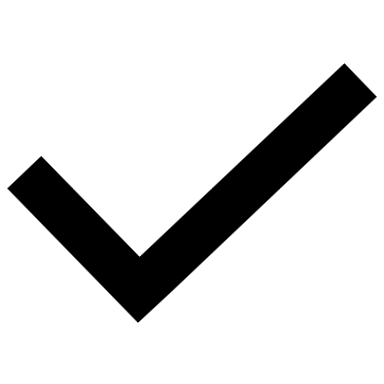 |
| Maruf *et al.* (2011) [31] | 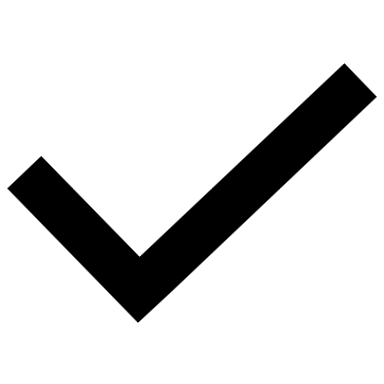 | 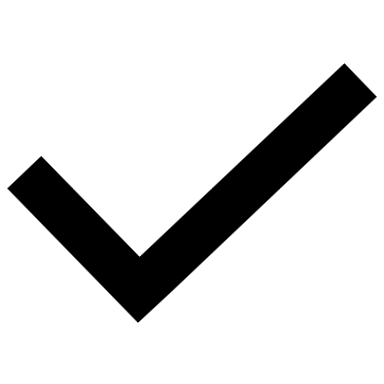 | 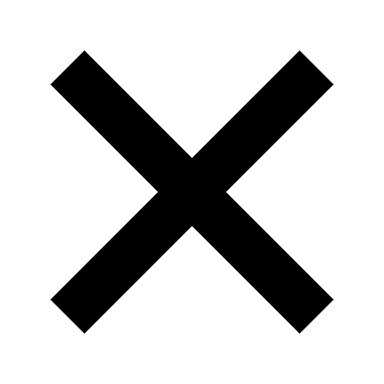 | 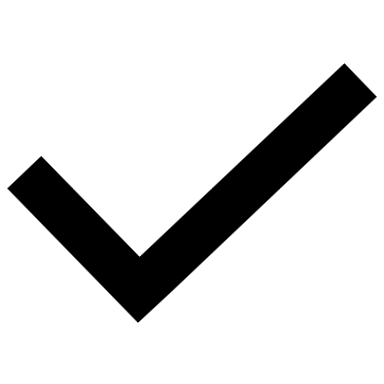 | 200 | NO | NO | Prospective | 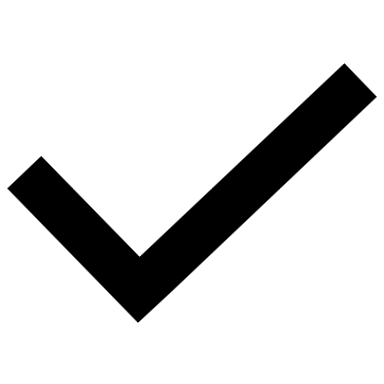 | 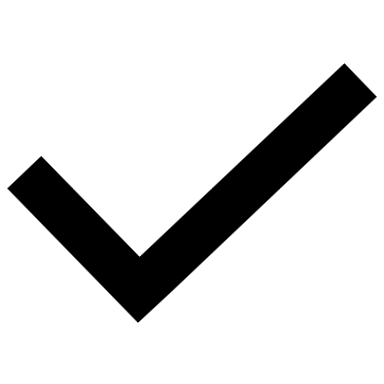 | 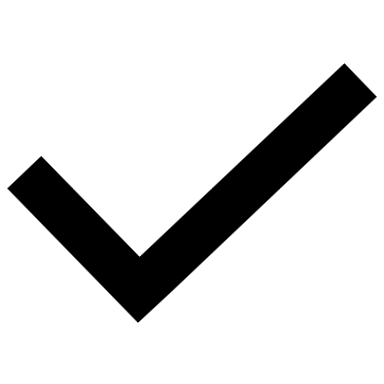 | 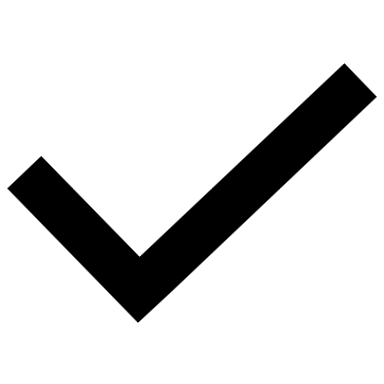 | 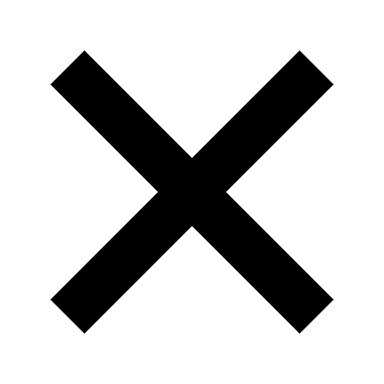 | 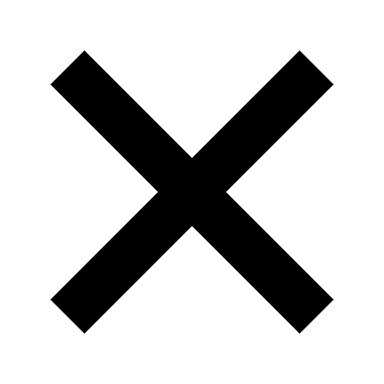 |  |  |  | 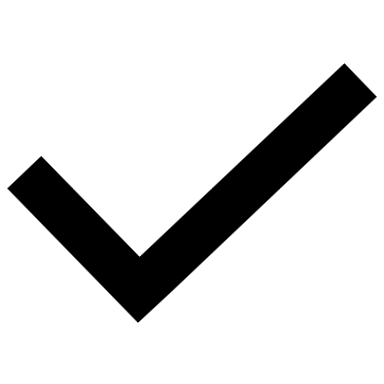 | 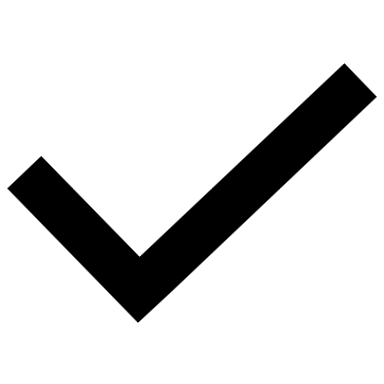 | | 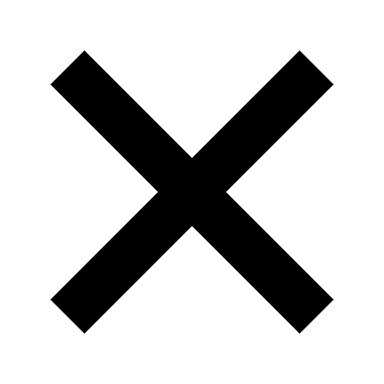 |  | |  |  |  |  | |  |  |
| Nahid *et al.* (2018) [32] |  |  |  |  | 161 | NO | NO | Cross-sectional |  |  |  |  |  |  |  |  |  |  |  | |  |  | |  |  |  |  | |  |  |
| Nairuz *et al.* (2021) [33] |  |  |  |  | 180 | NO | NO | Cross-sectional |  |  |  |  |  |  |  |  |  |  |  | |  |  | |  |  |  |  | |  |  |
| Parvin *et al.* (2021) [34] |  |  |  |  | 180 | NO | NO | Cross-sectional |  |  |  |  |  |  |  |  |  |  |  | |  |  | |  |  |  |  | |  |  |
| Rashid *et al.* (2020) [35] |  |  |  |  | 250 | NO | NO | Cross-sectional |  |  |  |  |  |  |  |  |  |  |  | |  |  | |  |  |  |  | |  |  |
| Zahra *et al.* (2020) [36] |  |  |  |  | 160 | NO | NO | Cross-sectional |  |  |  |  |  |  |  |  |  |  |  | |  |  | |  |  |  |  | |  |  |
| | Studies included in Supplementary Table S1 (n=16) | | --- | | | | | | | | | | | | | | | | | | | | | | | | | | | | | | | |
| Ahsan *et al.* (2003) [38] |  |  |  |  | 134 | NO | NO | Cross-sectional |  |  |  |  |  |  |  |  |  |  |  | |  |  | |  |  |  |  | |  |  |
| Akhter *et al.* (2016) [39] |  |  |  |  | 188 | NO | NO | Cross-sectional |  |  |  |  |  |  |  |  |  |  |  | |  |  | |  |  |  |  | |  |  |
| Ali *et al.* (2008) [40] |  |  |  |  | 141 | NO | NO | Prospective |  |  |  |  |  |  |  |  |  |  |  | |  |  | |  |  |  |  | |  |  |
| Aziz *et al.* (2019) [41] |  |  |  |  | 201 | NO | NO | Prospective |  |  |  |  |  |  |  |  |  |  |  | |  |  | |  |  |  |  | |  |  |
| Hasan *et al.* (2019) [42] |  |  |  |  | 200 | NO | NO | Cross-sectional |  |  |  |  |  |  |  |  |  |  |  | |  |  | |  |  |  |  | |  |  |
| Hosen *et al.* (2015) [43] |  |  |  |  | 242 | NO | NO | Cross-sectional |  |  |  |  |  |  |  |  |  |  |  | |  |  | |  |  |  |  | |  |  |
| Islam *et al.* (2013) [44] |  |  |  |  | 222 | NO | NO | Cross-sectional |  |  |  |  |  |  |  |  |  |  |  | |  |  | |  |  |  |  | |  |  |
| Islam *et al.* (2018) [45] |  |  |  |  | 125 | NO | NO | Prospective Observational |  |  |  |  |  |  |  |  |  |  |  | |  |  | |  |  |  |  | |  |  |
| Islam *et al.* (2021) [37] |  |  |  |  | 1000 | NO | NO | Prospective |  |  |  |  |  |  |  |  |  |  |  | |  |  | |  |  |  |  | |  |  |
| Jahan *et al.* (2019) [46] |  |  |  |  | 290 | NO | NO | Cross-sectional |  |  |  |  |  |  |  |  |  |  |  | |  |  | |  |  |  |  | |  |  |
| Khan *et al.* (2020) [47] |  |  |  |  | 181 | NO | NO | Prospective |  |  |  |  |  |  |  |  |  |  |  | |  |  | |  |  |  |  | |  |  |
| McCarty *et al.* (2007) [48] |  |  |  |  | 1200 | NO | NO | Cross-sectional |  |  |  |  |  |  |  |  |  |  |  | |  |  | |  |  |  |  | |  |  |
| Montazid *et al.* (2021) [49] |  |  |  |  | 673 | NO | NO | Prospective |  |  |  |  |  |  |  |  |  |  |  | |  |  | |  |  |  |  | |  |  |
| Ng *et al.* (2014) [50] |  |  |  |  | 127 | NO | NO | Cross-sectional |  |  |  |  |  |  |  |  |  |  |  | |  |  | |  |  |  |  | |  |  |
| Sonia *et al.* (2021) [51] |  |  |  |  | 358 | NO | NO | Cross-sectional |  |  |  |  |  |  |  |  |  |  |  | |  |  | |  |  |  |  | |  |  |
| Tasnim *et al.* (2017) [52] |  |  |  |  | 444 | NO | NO | Cross-sectional |  |  |  |  |  |  |  |  |  |  |  | |  |  | |  |  |  |  | |  |  |

Tick mark, “Yes”; Cross mark, “No”: Not mentioned in the manuscript or the method(s) paper that the authors referenced; Blank, “Not applicable” as the answer to the main question is "No".
